# Supplementary material for: Which hand is mine? Discriminating body ownership perception in a two-alternative forced-choice task
Source: PubMed Central journal article supplement (PMC7593318; doi:10.3758/s13414-020-02107-x), 2020-08-27

## Supplementary material

### Inclusion phase:

Figure S.1: Additional picture of the robotic arms used in both experiments

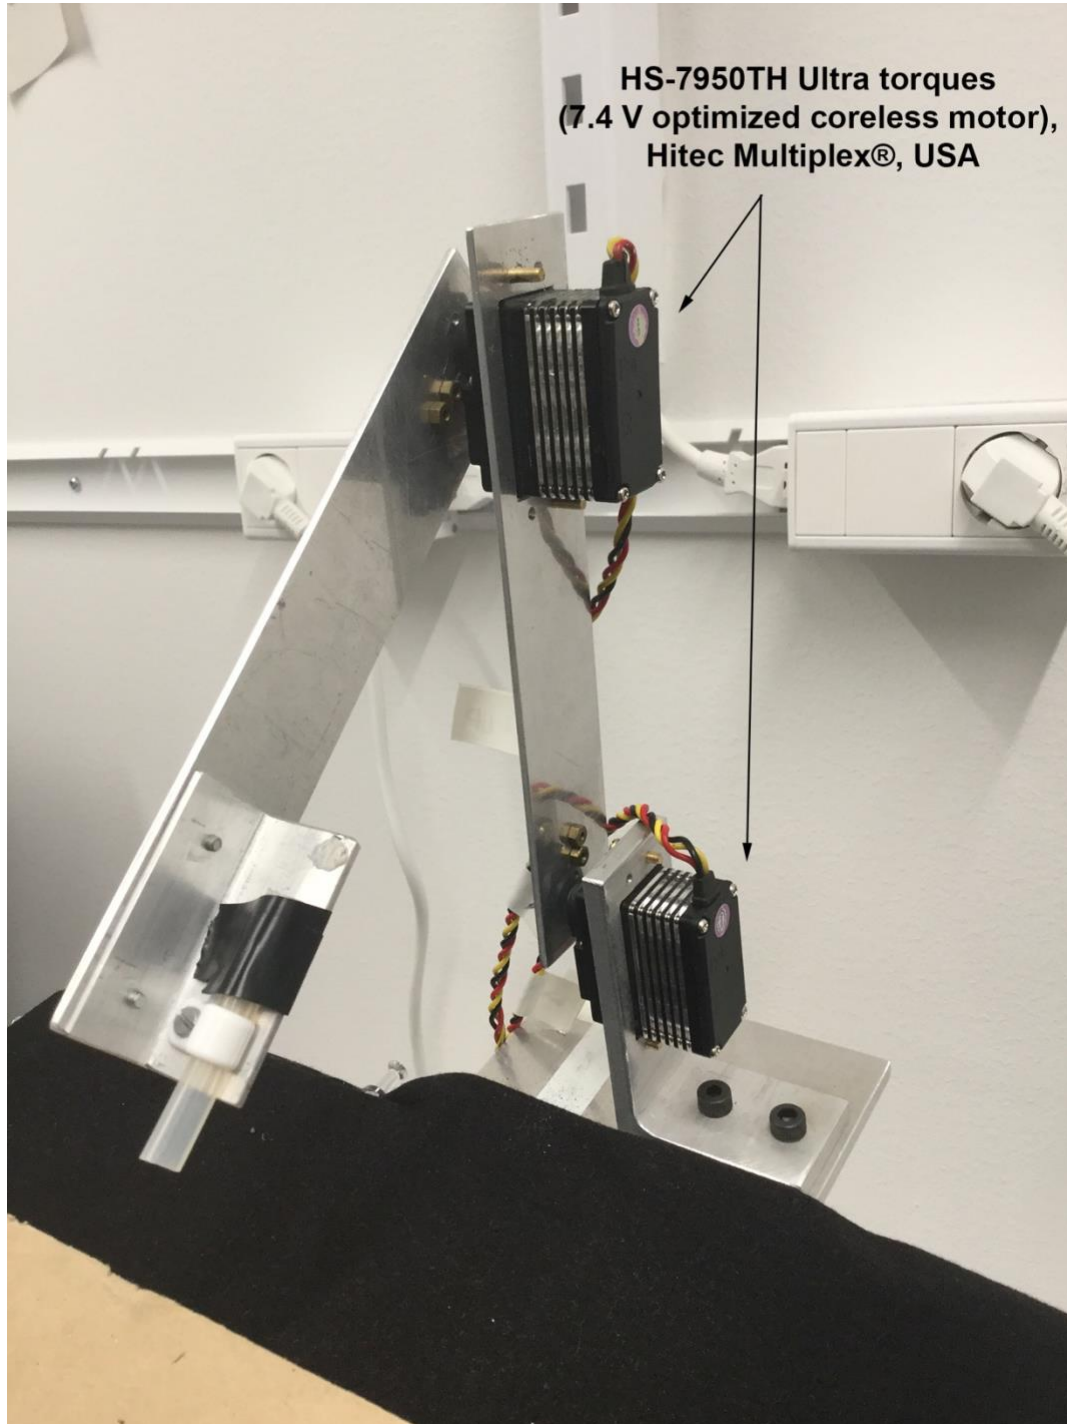

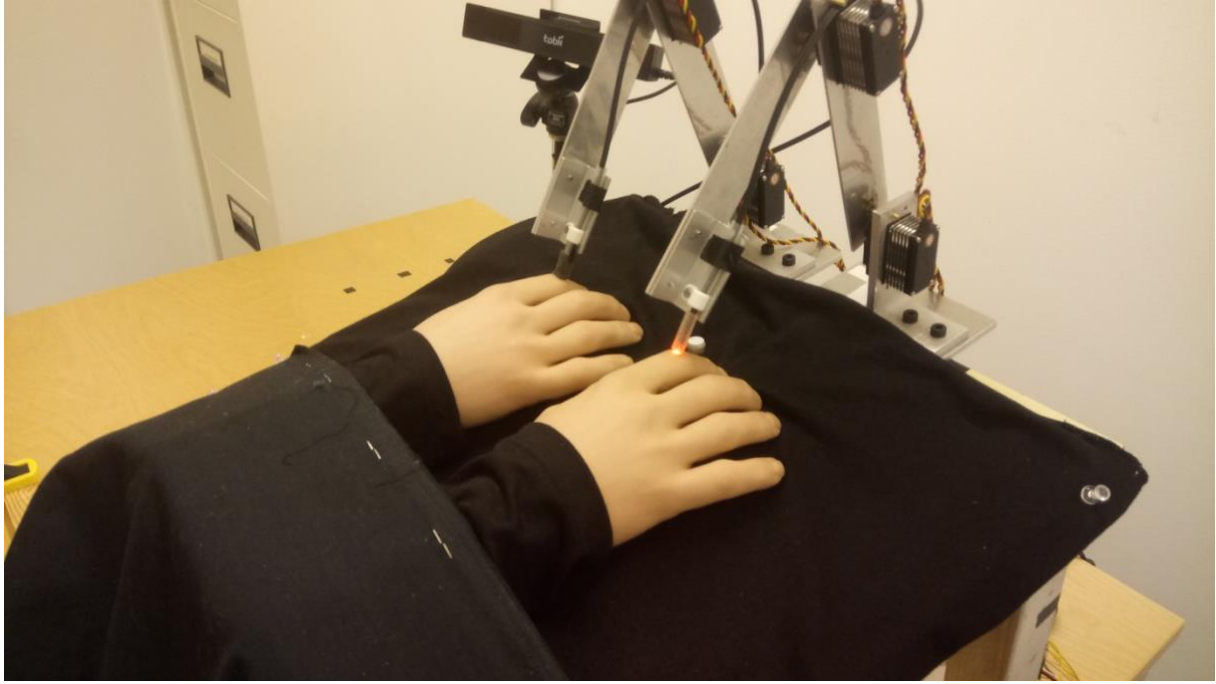



Figure S.3: Questionnaire results for the participants included in experiment 1. The first three statements concern ownership perception, while the other 6 are control statements. Only the participants with a clear RHI experience (ownership score > 1; difference ownership/control > 1) were allowed to take part in experiment 1.

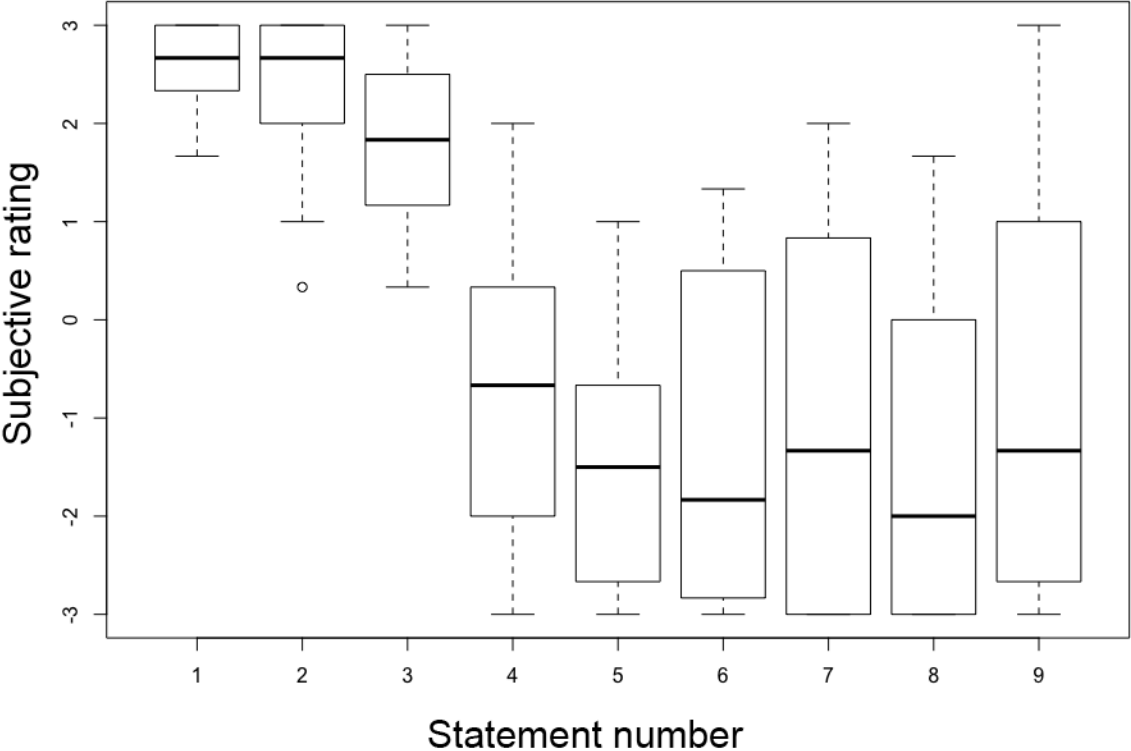

Figure S.4: Questionnaire results for the participants included in experiment 2. The first three statements concern ownership perception, while the other 6 are control statements. Only the participants with a clear RHI experience (ownership score > 1; difference ownership/control > 1) were allowed to take part in experiment 2.

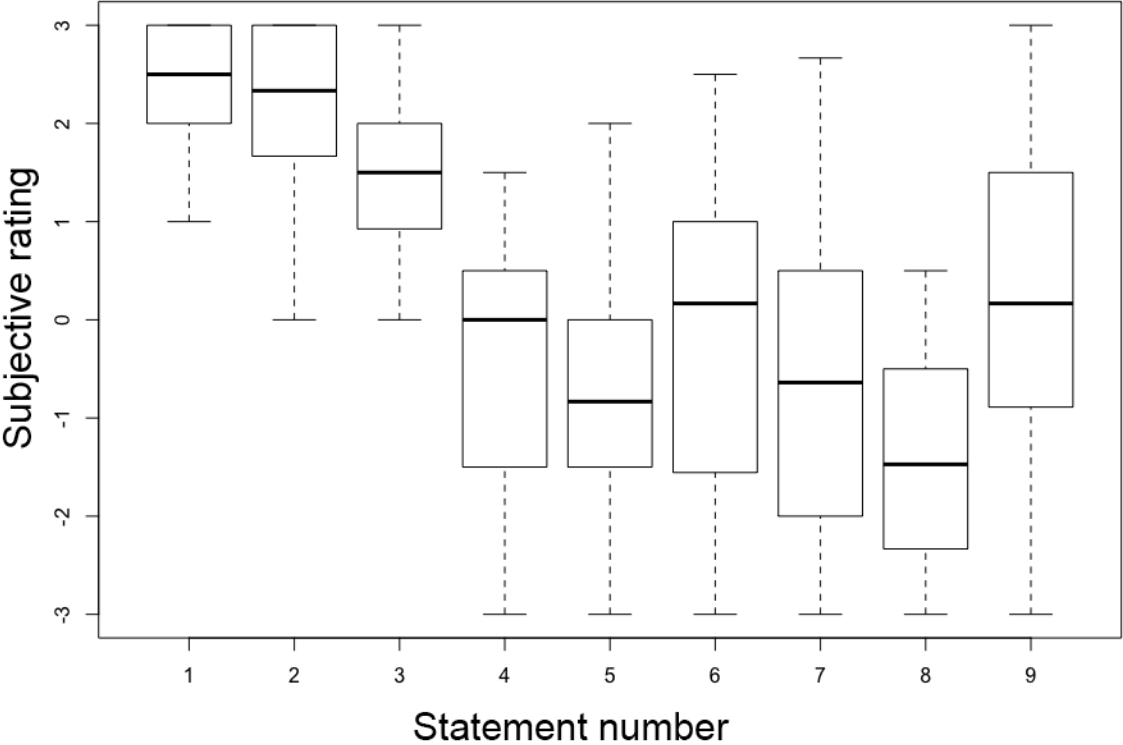

Table S.1: Individual results of the control experiment.

The values in red are those outside of the interval [mean – 3 x SD; mean + 3 x SD] calculated using the PSE and sigma values obtained in the *illusion* condition.

| PSE         | Illusion | Wider | Rotated | SIGMA       | Illusion | Wider                 | Rotated              |
|-------------|----------|-------|---------|-------------|----------|-----------------------|----------------------|
| 1           | 44       | 615   | 1840000 | 1           | 262      | 1190                  | 10500000             |
| 2           | 141      | 43100 | 47500   | 2           | 440      | 1620000               | 24500000000000000000 |
| 3           | -47      | -55   | -182    | 3           | 79       | 20900000000000000000  | 464                  |
| 4           | -1       | -1    | -161    | 4           | 277      | 44500000000000000000  | 630                  |
| 5           | -62      | -483  | -1      | 5           | 160      | 74760                 | 1151                 |
| 6           | -62      | -1057 | 0       | 6           | 160      | 2871                  | 911                  |
| 7           | -55      | -226  | -4370   | 7           | 129      | 903                   | 11100                |
| 8           | -49      | -62   | -402    | 8           | 176      | 40050000000000000000  | 4600                 |
| 9           | -37      | -43   | 127     | 9           | 241      | 132000000000000000000 | 1980                 |
| 10          | -18      | -219  | -194    | 10          | 140      | 1080                  | 963                  |
| Mean        | -15      |       |         | Mean        | 206      |                       |                      |
| SD          | 61       |       |         | SD          | 98       |                       |                      |
| Mean + 3 SD | 167      |       |         | Mean + 3 SD | 500      |                       |                      |
| Mean - 3 SD | -196     |       |         | Mean - 3 SD | -87      |                       |                      |

Figure S.5: Plots for individual subjects in experiment 1

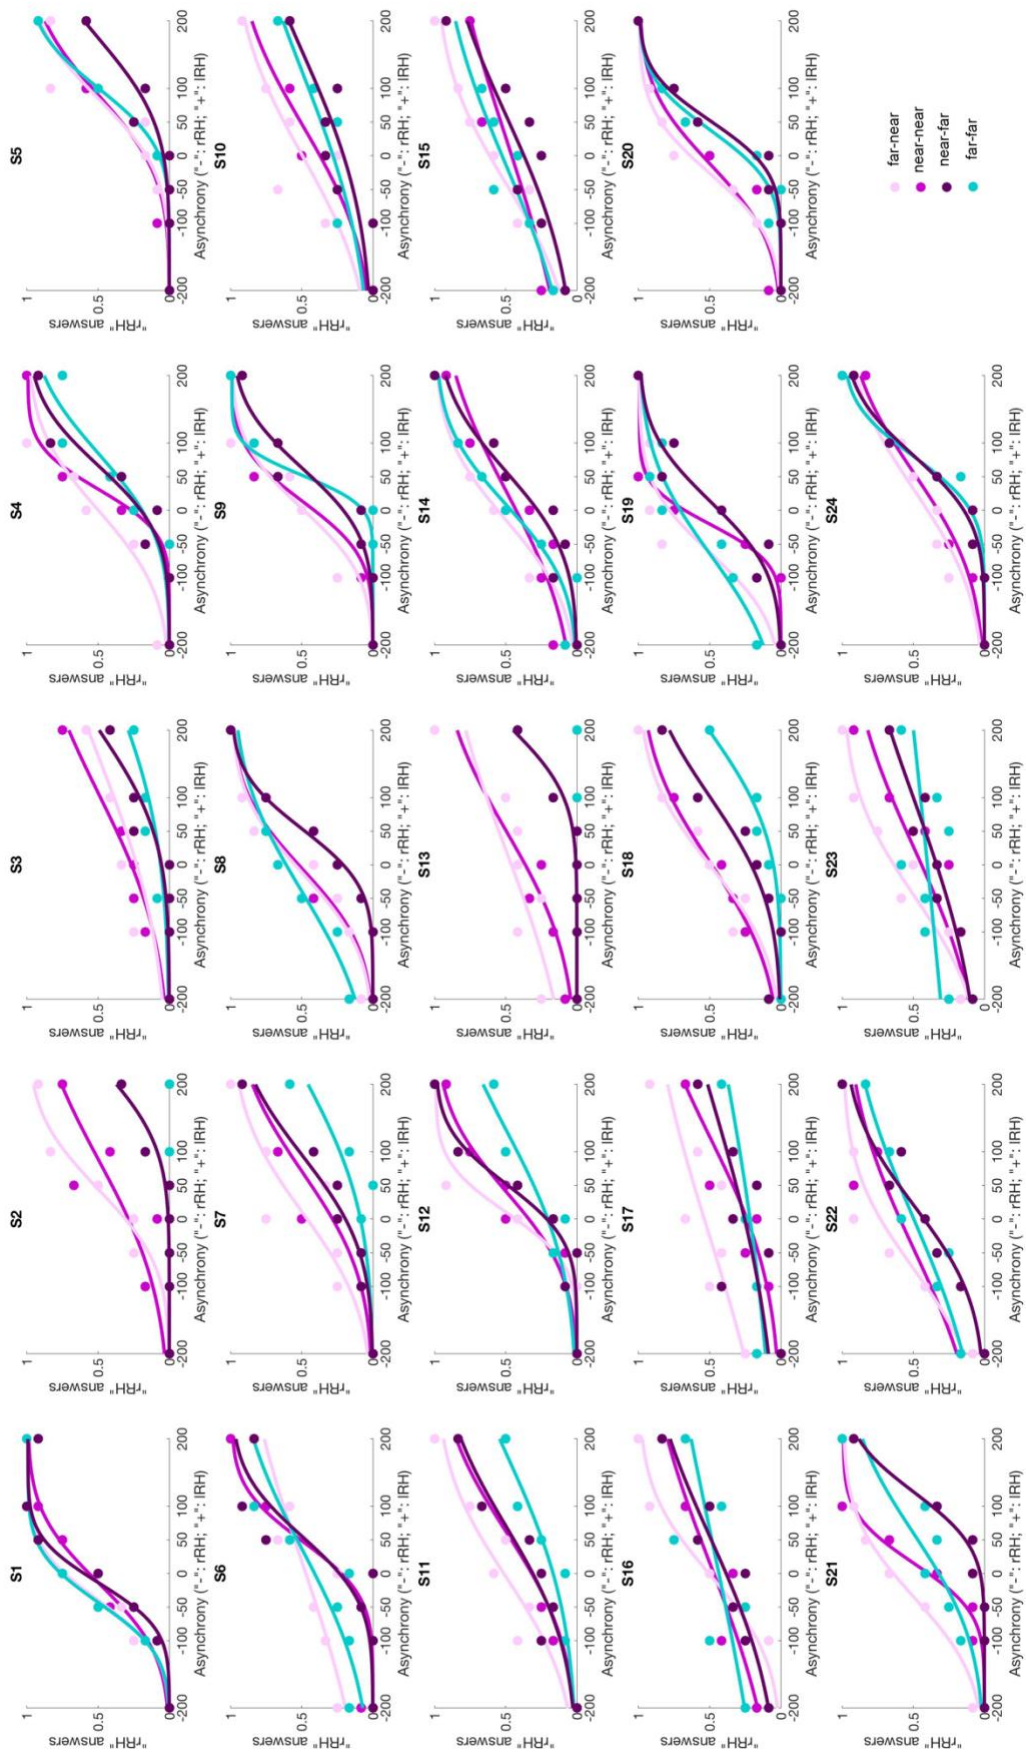

Figure S.6: Plots for individual subjects in experiment 2 when the real hand is touched by plastic.

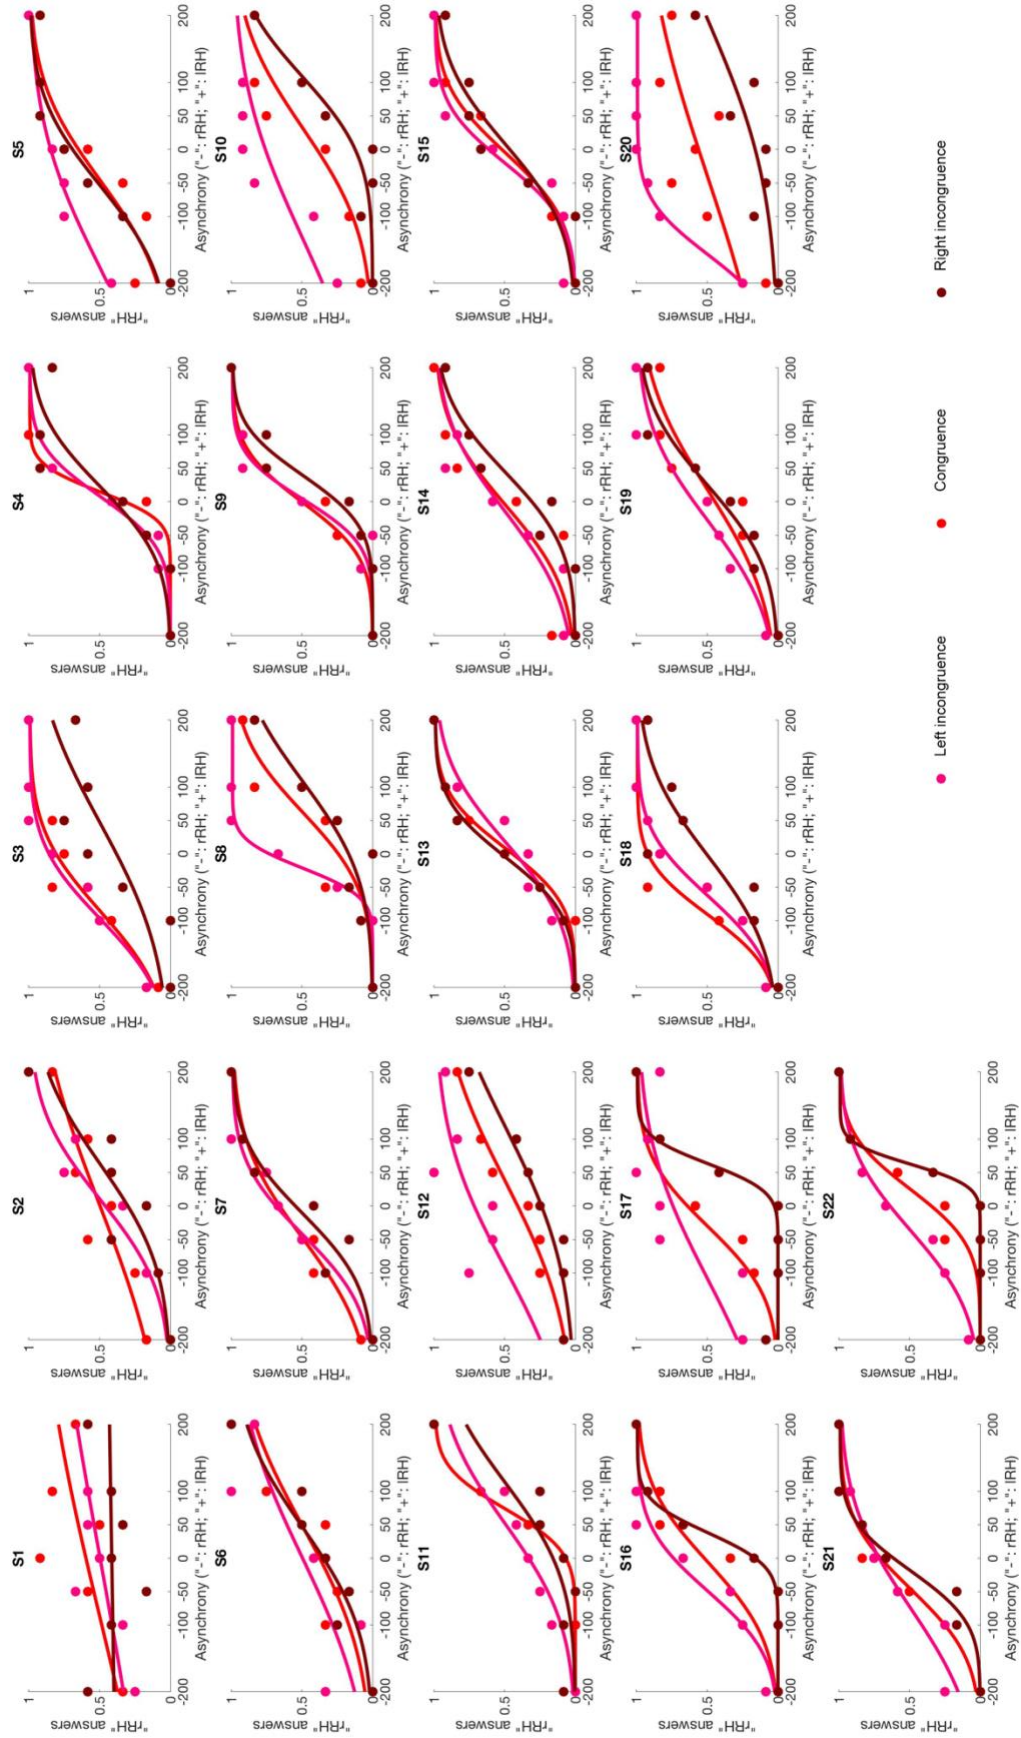

Figure S.7: Plots for individual subjects in experiment 2 when the real hand is touched by foam



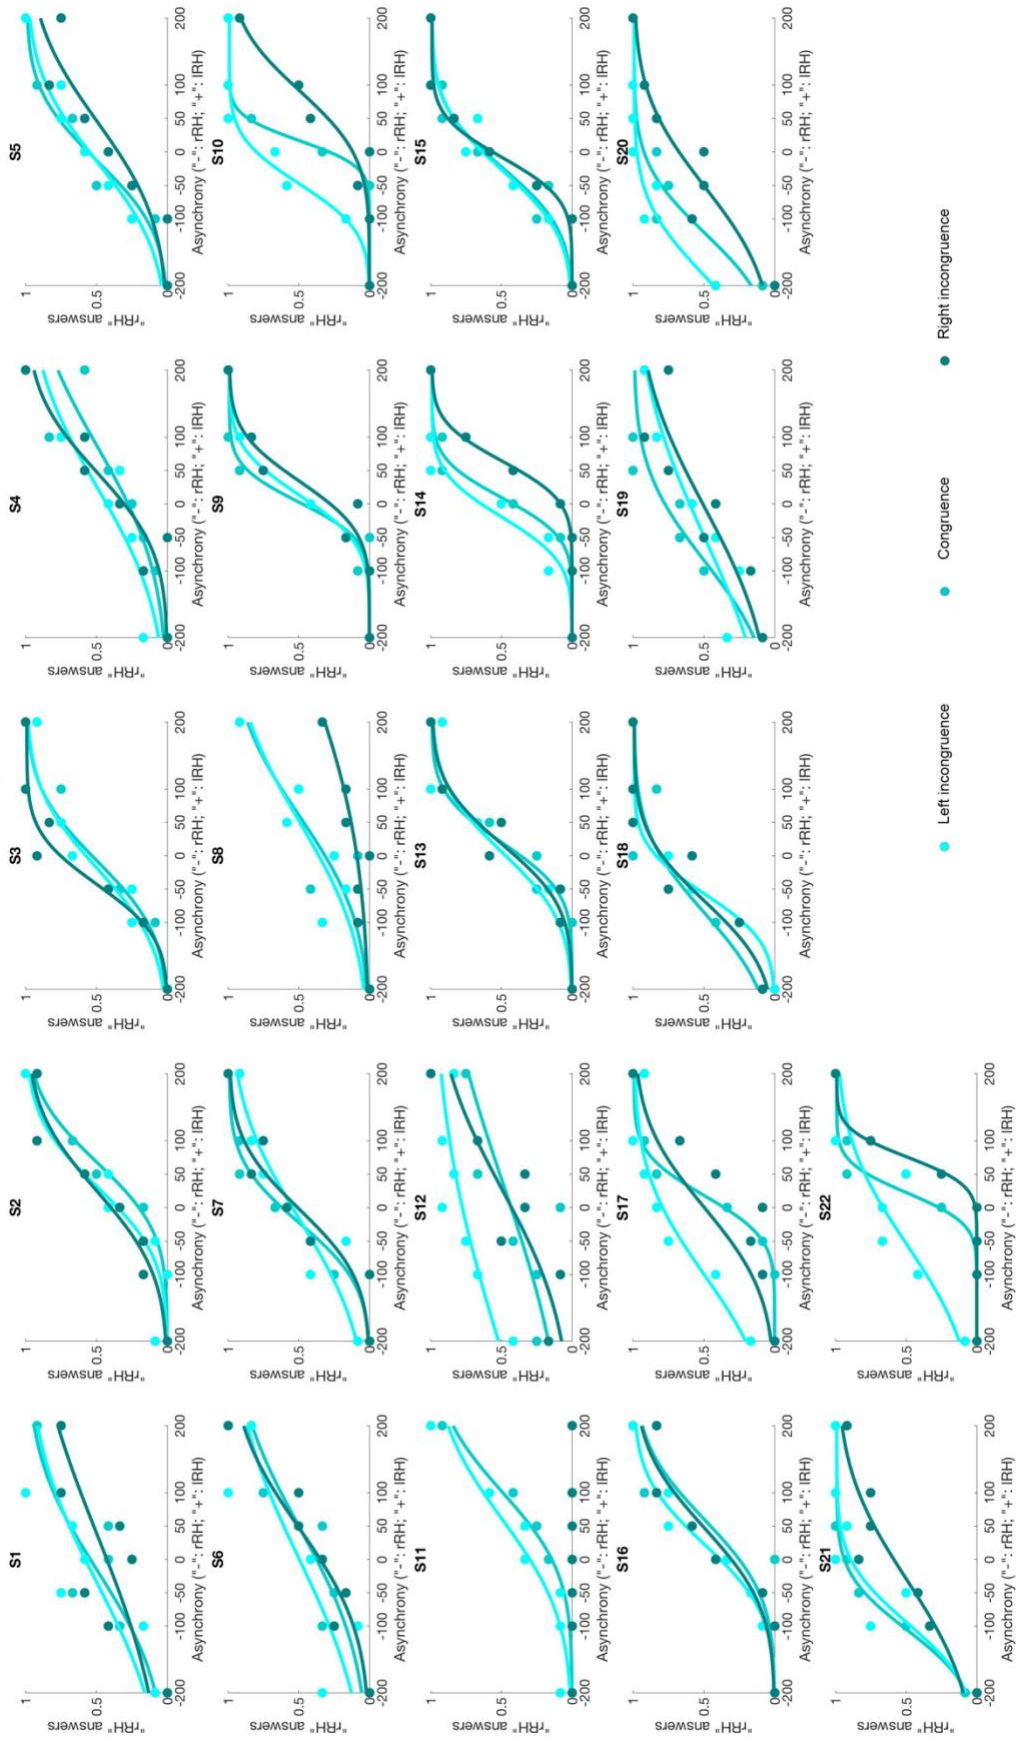

Figure S.8: The proportion of “the right rubber hand felt the most like my hand” answers under different asynchrony conditions in participants who did not feel the RHI.

These 15 participants (8 males, 26.3 +/- 4 years) did not pass the inclusion criterion when tested on the RHI in the screening procedure but were tested in the 2-AFC ownership discrimination task. The same procedure was used as in the main experiment but with only one condition, namely, that when the two rubber hands were placed at identical distances from the real hand and touched by the firm plastic tubes at the seven asynchronies (12 seconds of visual tactile stimulation, 12 repetitions per condition, one experimental block). However, there were some slight variations in the setups as these participants were tested in different experiments (S1: the rubber hands were 6 cm away from the real hand instead of 5 cm; S2 to S5: experiment 1 setup; S6 to S9: experiment 2 setup; S10 to S15: setup included small changes in the robots and table design for another study conducted by our team), but these differences were small and should not have affected the basic discrimination task. As expected, these individuals were unable to reliably discriminate illusory hand ownership. Specifically, the results suggest that 14 out of the 15 participants were unable to discriminate illusory ownership because their data did not fit the cumulative Gaussian function and/or the corresponding fitting parameters were behaviorally nonsensical (e.g., a PSE equal to 571 ms, which indicated that the rubber hands were as likely to be chosen by the participant when the right rubber hand was touched synchronously with the real hand and the left rubber hand 571 ms later). These patterns of responses were different from the groups of illusion responders in the main experiments (compare to Fig. S5, S6, S7) but similar to those observed in the control experiment under the condition where body ownership towards any rubber hand was not elicited. These results are also informative in that they show that these individuals followed the original instruction and did not try to overcome the lack of illusion by switching strategies and starting to report visuotactile synchrony instead.

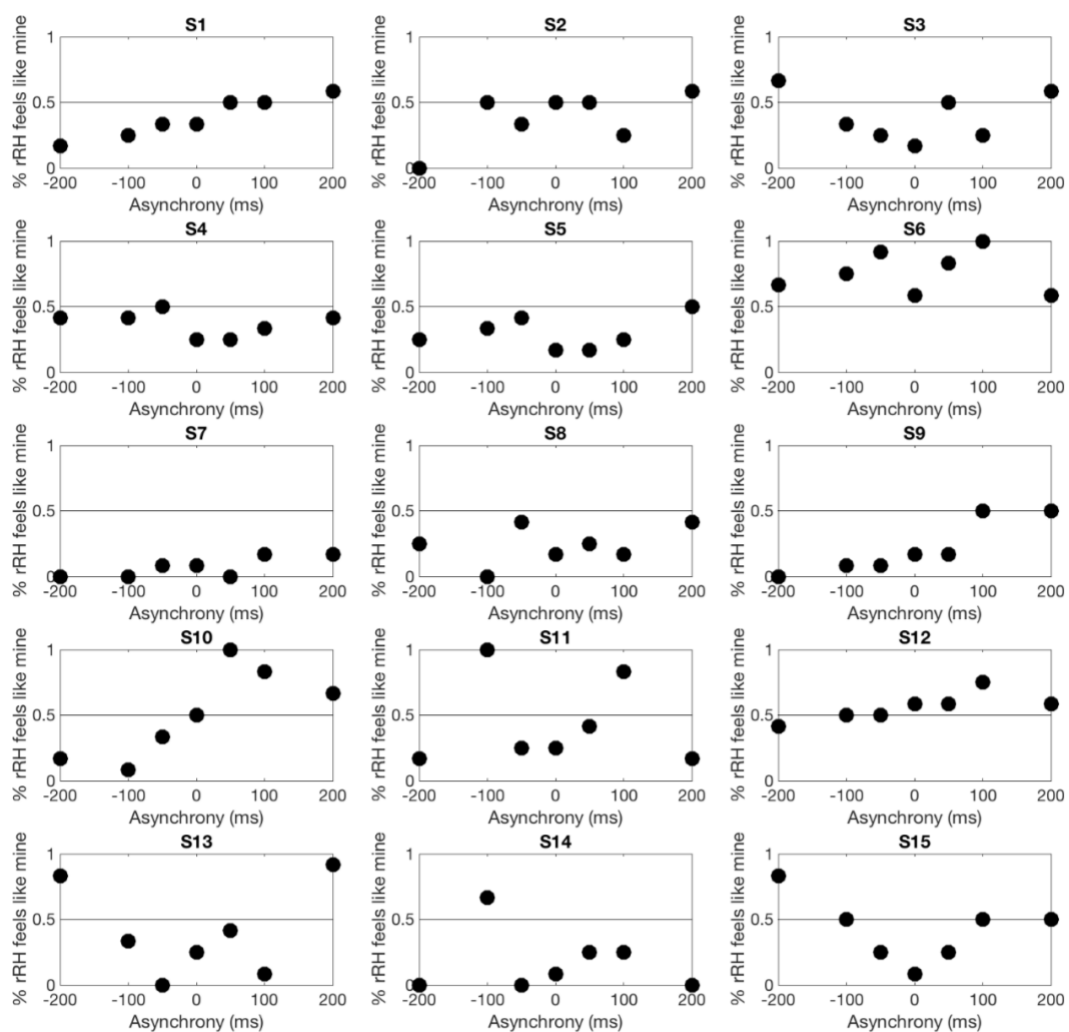

Figure S.9: Number of “the right rubber hand felt the most like my hand” answers under different asynchrony conditions for 15 participants who did not feel the RHI. These data are plotted for descriptive purposes only.

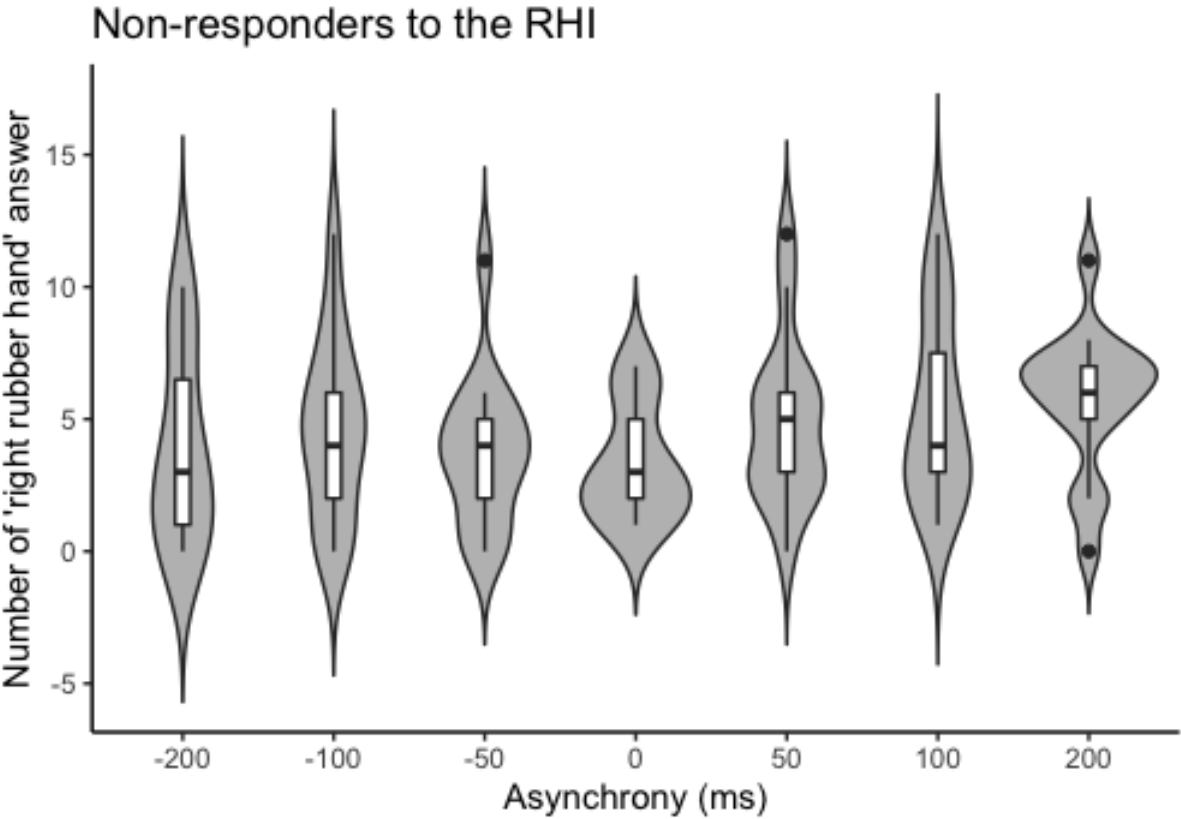

Supplement: 13414_2020_2107_MOESM1_ESM.pdf [file 13414_2020_2107_MOESM1_ESM.pdf]
